# Supplementary material
Source: publisher site journal article supplement (https://www.dovepress.com/get_supplementary_file.php?f=+401726.docx)
Supplement: Supplementary file 1 [file get_supplementary_file.php]

**Title:** Identifying Non-Steroidal Anti-Inflammatory drug (NSAID) users among people with osteoarthritis through administrative and clinician-reported data – A validation study of 116,162 patients

**Author list:** Andrea Dell’Isola1, Ali Kiadaliri1, Clara Hellberg1, Aleksandra Turkiewicz1, Martin Englund1

**Author Affiliations:** 1: Clinical Epidemiology Unit, Department of Clinical Sciences Lund, Orthopedics, Lund University, Lund, Sweden.

**Corresponding author details**: Andrea Dell’Isola, PhD, PT; ORC-ID: [0000-0002-0319-458X](https://orcid.org/0000-0002-0319-458X) Email: [andrea.dellisola@med.lu.se](mailto:andrea.dellisola@med.lu.se).

**Supplementary File 1:** NSAIDs based on COX selectivity, in bold pharmaceuticals available also over the counter (OTC)

| **NSAID** | **ATC code** | **Dispensation in the 3 months before intervention** |
| --- | --- | --- |
| Naproxen  Naproxen, esomeprazol | M01AE02, M01AE52 | 14,850  117 |
| **Diclofenac***  Diklofenac, misoprostol | **M01AB05**  M01AB55 | 10,145  867 |
| **Ibuprofen** | **M01AE01** | 5,269 |
| Etoricoxib | M01AH05 | 4,691 |
| Ketoprofen | M01AE03 | 1,858 |
| Dexibuprofen | M01AE14 | 992 |
| Nabumetone | M01AX01 | 609 |
| Celecoxib | M01AH01 | 562 |
| Meloxicam | M01AC06 | 113 |
| Tenoxicam | M01AC02 | 87 |
| Piroxicam | M01AC01 | 62 |
| Indomethacin | M01AB01 | 8 |
| Iornoxicam | M01AC05 | 2 |
| Ketorolac | M01AB15 | 0 |
| Rofecoxib | M01AH02 | 0 |
| Valdecoxib | M01AH03 | 0 |
| Parecoxib | M01AH04 | 0 |
| Lumiracoxib | M01AH06 | 0 |
| Polmacoxib | M01AH07 | 0 |
| **Acetylsalicylic acid** | **N02BA01** | 0 |
|  |  | **Total number of dispensations:**  40,232 |
| In bold compounds available as over the counter (OTC) medications. * Available as OTC **until 2020/06/01** | | |

**Supplementary File 2:** Prevalence of NSAID use in the whole sample and in age and pain groups

| **User group** | **Prevalence** | **Lower 95% CI** | **Upper 95% CI** | **Number of subjects** |
| --- | --- | --- | --- | --- |
| **All** |  |  |  |  |
| Non-users | 50.5% | 50.2% | 50.8% | 58,617 |
| OTC only users | 24.7% | 24.5% | 25.0% | 27,723 |
| Non-user with prescription | 6.6% | 6.4% | 6.7% | 7,632 |
| Prescription users | 18.2% | 18.0% | 18.5% | 21,190 |
| **<60 years** |  |  |  |  |
| Non-users | 39.4% | 38.8% | 39.9% | 10,654 |
| OTC only users | 28.7% | 28.2% | 29.3% | 7,831 |
| Non-user with prescription | 7.4% | 7.1% | 7.7% | 1,991 |
| Prescription users | 24.6% | 24.1% | 25.1% | 6,690 |
| **60-69 years** |  |  |  |  |
| Non-users | 47.5% | 47.0% | 48.0% | 20,540 |
| OTC only users | 26.0% | 25.5% | 26.4% | 11,208 |
| Non-user with prescription | 6.8% | 6.6% | 7.0% | 2,934 |
| Prescription users | 19.8% | 19.4% | 20.1% | 8,539 |
| **70-79 years** |  |  |  |  |
| Non-users | 57.8% | 57.2% | 58.3% | 21,624 |
| OTC only users | 22.3% | 21.9% | 22.7% | 8,304 |
| Non-user with prescription | 6.0% | 5.7% | 6.2% | 2,231 |
| Prescription users | 14.0% | 13.7% | 14.4% | 5,220 |
| **80+ years** |  |  |  |  |
| Non-users | 69.0% | 68.0% | 70.0% | 5,799 |
| OTC only users | 16.5% | 15.7% | 17.3% | 1,380 |
| Non-user with prescription | 5.7% | 5.2% | 6.2% | 476 |
| Prescription users | 8.8% | 8.3% | 9.5% | 741 |
| **Mild pain** |  |  |  |  |
| Non-users | 59.0% | 58.5% | 59.6% | 19,846 |
| OTC only users | 22.6% | 22.1% | 23.0% | 7,436 |
| Non-user with prescription | 5.9% | 5.7% | 6.2% | 1,963 |
| Prescription users | 12.5% | 12.1% | 12.9% | 4,096 |
| **Moderate pain** |  |  |  |  |
| Non-users | 48.4% | 48.0% | 48.8% | 30,313 |
| OTC only users | 25.8% | 25.5% | 26.2% | 16,153 |
| Non-user with prescription | 6.5% | 6.3% | 6.7% | 4,070 |
| Prescription users | 19.3% | 19.0% | 19.6% | 12,093 |
| **Severe pain** |  |  |  |  |
| Non-users | 43.0% | 42.3% | 43.6% | 8,458 |
| OTC only users | 25.1% | 24.5% | 25.7% | 5,134 |
| Non-user with prescription | 7.8% | 7.5% | 8.2% | 1,599 |
| Prescription users | 24.1% | 23.5% | 24.7% | 5,001 |

OTC: Over-The-Counter; CI: Confidence Interval; Estimates for age groups are standardized by sex and pain (mild, moderate, severe) while estimates for pain are standardized by sex and age (5 years strata)

**Supplementary File 3**: Prevalence of reported NSAID use and psychometric values of dispensed NSAIDs in the 120 days preceding a first-line intervention to identify people reporting use of NSAIDs.

| **Sample** | **Sensitivity (95%CIs)** | **Specificity (95%CIs)** | **PPV (95%CIs)** | **NPV(95%CIs)** | **Prevalence of self-reported NSAIDs users** |
| --- | --- | --- | --- | --- | --- |
| **All** |  |  |  |  |  |
|  | 47.5%  (47.1%; 7.9%) | 85.8%  (85.5%; 86.1%) | 71.6%  (71.1% 72.1%) | 68.4%  (68.1%; 68.9%) | 43%  (42.7%; 43.3%) |
| **Pain strata (0/10 NRS scale)** |  |  |  |  |  |
| Mild  (0-4),  N: 33.341 | 41.1%  (40.2%; 2.0%) | 88.6%  (88.1%; 89.0%) | 65.5%  (64.4%; 66.6%) | 74.0%  (73.4%; 74.5%) | 34.6%  (34.1%; 35.1%) |
| Moderate  (5-7),  N: 62,629 | 47.9%  (47.3%; 8.5%) | 85.4%  (85.0%; 85.8%) | 72.9%  (72.3% 73.6%) | 66.6%  (66.2%; 67.1%) | 45.1%  (44.7%; 45.5%) |
| Severe  (8-10),  N: 20,192 | 53.6%  (52.6%; 4.6%) | 81.2%  (80.4%; 81.9%) | 74.2%  (73.2%; 75.2%) | 63.5%  (62.6%; 64.3%) | 50.2%  (49.5%; 50.9%) |
| **Age strata (years)** |  |  |  |  |  |
| <60,  N:27,166 | 51.6%  (50.8%; 2.4%) | 80.9%  (80.2%; 81.6%) | 75.6%  (74.7%; 76.4%) | 59.3%  (58.5% 60.0%) | 57.6%  (56.9%; 58.3%) |
| 60-69, N:43,221 | 48.1%  (47.4%; 8.8%) | 84.6%  (84.2%; 85.1%) | 72.5%  (71.7%; 73.2%) | 66.0%  (65.4%; 66.5%) | 45.7%  (45.2%; 46.2%) |
| 70-79, N:37,379 | 43.5%  (42.7%; 4.4%) | 88.2%  (87.8%; 88.6%) | 67.7%  (66.7%; 68.7%) | 73.4%  (72.9%; 73.9%) | 36.2%  (35.7% 36.7%) |
| >80,  N: 8,396 | 39.3%  (37.2%; 1.4%) | 90.8%  (90.1%; 91.5%) | 59.1%  (56.5%; 61.7%) | 81.6%  (80.6%; 82.5%) | 25.3%  (24.3%; 26.2%) |
| CIs: Confidence Intervals; PPV: positive Predictive Value; NPV: Negative Predictive Value; NSAID: Non-Steroidal Anti-Inflammatory Drugs; Numeric Rating Scale | | | | | |

**Supplementary File 4**: Prevalence of NSAID use stratified by calendar year.

| **Years** | **OTC users** | **Prescription users** | **Non-users** | **Non-users with prescription** | **Total number of patients*** |
| --- | --- | --- | --- | --- | --- |
| **2008** | 17.9% (14.2; 22.2) | 28.8% (24.4; 33.6) | 40.6% (35.7; 45.8) | 12.7% (9.6; 16.7) | 298 |
| **2009** | 18.7% (16.5; 21.1) | 22.7% (20.2; 25.4) | 49.1% (46.1; 52.1) | 9.5% (7.9; 11.5) | 1,118 |
| **2010** | 24.2% (22.2; 26.3) | 23.1% (21.1; 25.2) | 46.8% (44.4; 49.2) | 5.9% (4.9; 7.2) | 1,686 |
| **2011** | 22.6% (21.3; 23.9) | 22.9% (21.7; 24.2) | 47.4% (46; 48.9) | 7.1% (6.3; 7.9) | 4,347 |
| **2012** | 22.9% (21.9; 23.9) | 22.6% (21.6; 23.6) | 47.1% (45.9; 48.3) | 7.4% (6.8; 8.1) | 7,200 |
| **2013** | 23.6% (22.8; 24.5) | 21.3% (20.4; 22.1) | 48.2% (47.2; 49.1) | 7% (6.5; 7.5) | 10,091 |
| **2014** | 23.8% (23; 24.5) | 20.1% (19.4; 20.8) | 49.1% (48.2; 49.9) | 7.1% (6.7; 7.6) | 13,577 |
| **2015** | 25.1% (24.4; 25.7) | 19.4% (18.8; 20) | 49% (48.3; 49.8) | 6.5% (6.1; 6.9) | 15,728 |
| **2016** | 25.5% (24.9; 26.2) | 17.7% (17.1; 18.2) | 50.5% (49.7; 51.2) | 6.3% (6; 6.7) | 17,309 |
| **2017** | 26.1% (25.5; 26.8) | 15.9% (15.3; 16.4) | 51.8% (51.1; 52.5) | 6.2% (5.9; 6.6) | 17,367 |
| **2018** | 25.6% (24.9; 26.3) | 15.4% (14.8; 16) | 53.1% (52.3; 53.9) | 5.9% (5.6; 6.3) | 14,964 |
| **2019** | 25% (24.2; 25.8) | 15.5% (14.9; 16.1) | 53.3% (52.4; 54.1) | 6.3% (5.9; 6.7) | 12,477 |

NSAID: Non-Steroidal Anti-Inflammatory Drugs; *This includes all the patients classified in the four NSAID user groups during one calendar year; estimates are standardized by sex, age (5-year strata), and pain (mild, moderate, severe)
